# Supplementary material
Source: PubMed Central journal article supplement (PMC4012605)
Supplement: supp_pp.114.238667_238667Supplementary_Table_1.pdf [file supp_pp.114.238667_238667Supplementary_Table_1.pdf]

**Supplementary Table I.** Summary of bioanalyzer traces of RNA samples from mesophyll and bundle sheath of *Setaria viridis*

|               | Sample | Volume ( $\mu\text{l}$ ) | Concentration ( $\text{ng}/\mu\text{l}$ ) | Yield ( $\mu\text{g}$ ) | RNA integrity (RIN) | rRNA ratio (28S/18S) |
|---------------|--------|--------------------------|-------------------------------------------|-------------------------|---------------------|----------------------|
| Mesophyll     | M1     | 50                       | 111                                       | 5.55                    | 7.60                | 1.30                 |
|               | M2     | 50                       | 132                                       | 6.60                    | 8.00                | 1.40                 |
|               | M3     | 50                       | 126                                       | 6.30                    | 7.90                | 1.20                 |
| Bundle Sheath | BS1    | 50                       | 131                                       | 6.55                    | 7.40                | 1.00                 |
|               | BS2    | 50                       | 224                                       | 11.20                   | 7.60                | 1.20                 |
|               | BS3    | 50                       | 77                                        | 3.85                    | 7.80                | 1.00                 |
