# Supplementary material
Source: PubMed Central journal article supplement (PMC4012605)
Supplement: supp_pp.114.238667_238667Supplementary_Table_2.pdf [file supp_pp.114.238667_238667Supplementary_Table_2.pdf]

**Supplementary Table II.** Mean fold change values for transcripts encoding C<sub>4</sub> proteins in *Setaria viridis* and maize. Genes are grouped according to cell type and ranked by mean fold change (high to low).

| Gene            | Cell Type | Setaria $\frac{BS}{M}$ | Maize $\frac{BS}{M}$ | Mean $\frac{BS}{M}$ | Mean Log <sub>2</sub> $\frac{BS}{M}$ |
|-----------------|-----------|------------------------|----------------------|---------------------|--------------------------------------|
| <i>GDC</i>      | BS        | 191.847                | 233.584              | 212.716             | 7.733                                |
| <i>FBA</i>      | BS        | 133.745                | 197.935              | 165.840             | 7.374                                |
| <i>PCK</i>      | BS        | 13.204                 | 258.371              | 135.787             | 7.085                                |
| <i>DCT2</i>     | BS        | 211.256                | 57.159               | 134.207             | 7.068                                |
| <i>NADP-ME</i>  | BS        | 147.536                | 101.237              | 124.386             | 6.959                                |
| <i>PRK</i>      | BS        | 156.169                | 82.365               | 119.267             | 6.898                                |
| <i>GCH</i>      | BS        | 152.067                | 58.310               | 105.189             | 6.717                                |
| <i>RBCS</i>     | BS        | 106.803                | 35.364               | 71.084              | 6.151                                |
| <i>SBP</i>      | BS        | 114.879                | 20.647               | 67.763              | 6.082                                |
| <i>RBCACT</i>   | BS        | 12.392                 | 118.028              | 65.210              | 6.027                                |
| <i>MEP3a</i>    | BS        | 16.707                 | 97.732               | 57.220              | 5.838                                |
| <i>SHMT</i>     | BS        | 19.306                 | 41.094               | 30.200              | 4.916                                |
| <i>RPE</i>      | BS        | 46.152                 | 7.112                | 26.632              | 4.735                                |
| <i>FBP</i>      | BS        | 18.565                 | 9.316                | 13.940              | 3.801                                |
| <i>GOX</i>      | BS        | 2.263                  | 12.887               | 7.575               | 2.921                                |
| <i>TKL</i>      | BS        | 5.378                  | 7.511                | 6.445               | 2.688                                |
| <i>CA</i>       | M         | 0.027                  | 0.034                | 0.031               | -5.033                               |
| <i>NADP-MDH</i> | M         | 0.042                  | 0.027                | 0.035               | -4.855                               |
| <i>OMT1</i>     | M         | 0.040                  | 0.032                | 0.036               | -4.806                               |
| <i>TPI</i>      | M         | 0.059                  | 0.019                | 0.039               | -4.671                               |
| <i>PEPC</i>     | M         | 0.033                  | 0.051                | 0.042               | -4.567                               |
| <i>ASP-AT</i>   | M         | 0.135                  | 0.020                | 0.078               | -3.683                               |
| <i>MEP3b</i>    | M         | 0.158                  | 0.056                | 0.107               | -3.224                               |
| <i>PPDK</i>     | M         | 0.049                  | 0.201                | 0.125               | -3.003                               |
| <i>AK</i>       | M         | 0.122                  | 0.153                | 0.138               | -2.861                               |
| <i>PPT</i>      | M         | 0.277                  | 0.115                | 0.196               | -2.350                               |
| <i>PPDK-RP</i>  | M         | 0.450                  | 0.053                | 0.251               | -1.993                               |
| <i>GAP-DH</i>   | M         | 0.541                  | 0.123                | 0.332               | -1.589                               |
| <i>DIT1</i>     | M         | 0.634                  | 0.074                | 0.354               | -1.498                               |
| <i>RPI</i>      | M/BS      | 57.048                 | 0.640                | 28.844              | 4.850                                |
| <i>PGK</i>      | M/BS      | 1.485                  | 0.298                | 0.891               | -0.166                               |
