# Supplementary material
Source: PubMed Central journal article supplement (PMC4012605)
Supplement: supp_pp.114.238667_238667Supplementary_Table_3.pdf [file supp_pp.114.238667_238667Supplementary_Table_3.pdf]

**Supplementary Table III.** Convergence in abundance of transcripts encoding components of the C<sub>4</sub> cycle in *Setaria viridis* and maize. Genes are grouped according to cell type and then ranked according to those that were most similar in the two C<sub>4</sub> lineages.

| Gene            | Cell Type | Setaria FC $\frac{BS}{M}$ | Maize FC $\frac{BS}{M}$ | $\frac{SetariaFC}{MaizeFC}$ |
|-----------------|-----------|---------------------------|-------------------------|-----------------------------|
| <i>GDC</i>      | BS        | 191.847                   | 233.584                 | 0.821                       |
| <i>TKL</i>      | BS        | 5.378                     | 7.511                   | 0.716                       |
| <i>NADP-ME</i>  | BS        | 147.536                   | 101.237                 | 1.457                       |
| <i>FBA</i>      | BS        | 133.745                   | 197.935                 | 0.676                       |
| <i>PRK</i>      | BS        | 156.169                   | 82.365                  | 1.896                       |
| <i>FBP</i>      | BS        | 18.565                    | 9.316                   | 1.993                       |
| <i>SHMT</i>     | BS        | 19.306                    | 41.094                  | 0.470                       |
| <i>GCH</i>      | BS        | 152.067                   | 58.310                  | 2.608                       |
| <i>RBCS</i>     | BS        | 106.803                   | 35.364                  | 3.020                       |
| <i>DCT2</i>     | BS        | 211.256                   | 57.159                  | 3.696                       |
| <i>SBP</i>      | BS        | 114.879                   | 20.647                  | 5.564                       |
| <i>GOX</i>      | BS        | 2.263                     | 12.887                  | 0.176                       |
| <i>MEP3a</i>    | BS        | 16.707                    | 97.732                  | 0.171                       |
| <i>RPE</i>      | BS        | 46.152                    | 7.112                   | 6.489                       |
| <i>RBCACT</i>   | BS        | 12.392                    | 118.028                 | 0.105                       |
| <i>PCK</i>      | BS        | 13.204                    | 258.371                 | 0.051                       |
| <i>CA</i>       | M         | 0.027                     | 0.034                   | 0.802                       |
| <i>AK</i>       | M         | 0.122                     | 0.153                   | 0.793                       |
| <i>OMT1</i>     | M         | 0.040                     | 0.032                   | 1.270                       |
| <i>PEPC</i>     | M         | 0.033                     | 0.051                   | 0.652                       |
| <i>NADP-MDH</i> | M         | 0.042                     | 0.027                   | 1.570                       |
| <i>PPT</i>      | M         | 0.277                     | 0.115                   | 2.405                       |
| <i>MEP3b</i>    | M         | 0.158                     | 0.056                   | 2.812                       |
| <i>TPI</i>      | M         | 0.059                     | 0.019                   | 3.140                       |
| <i>PPDK</i>     | M         | 0.049                     | 0.201                   | 0.244                       |
| <i>GAP-DH</i>   | M         | 0.541                     | 0.123                   | 4.381                       |
| <i>ASP-AT</i>   | M         | 0.135                     | 0.020                   | 6.628                       |
| <i>PPDK-RP</i>  | M         | 0.450                     | 0.053                   | 8.553                       |
| <i>DIT1</i>     | M         | 0.634                     | 0.074                   | 8.595                       |
| <i>RPI</i>      | M/BS      | 57.048                    | 0.640                   | 89.123                      |
| <i>PGK</i>      | M/BS      | 1.485                     | 0.298                   | 4.989                       |
