# Supplementary material
Source: PubMed Central journal article supplement (PMC4012605)
Supplement: supp_pp.114.238667_238667Supplementary_Table_4.pdf [file supp_pp.114.238667_238667Supplementary_Table_4.pdf]

**Supplementary Table IV.** C<sub>4</sub> genes from maize (Chang et al., 2012; Li et al., 2010) were used to identify syntenic orthologs in *Setaria* using the grass synteny database (Schnable et al., 2012). The majority of genes recruited into the C<sub>4</sub> pathway in maize and *Setaria* were syntenic. For *CA*, *RBCS*, *GDC*, and *SBP* no syntenic regions were found in the database, however phylogenetic inference has identified orthologous *CA* genes in *Setaria* and maize (Christin et al., 2013). The number of genes in each gene family from *Setaria* and maize are listed.

| Gene            | Maize ID      | Syntenic ortholog | C4 gene ID  | Matched | Role             | Genes per family - <i>Setaria</i> | Genes per family - Maize |
|-----------------|---------------|-------------------|-------------|---------|------------------|-----------------------------------|--------------------------|
| <i>CA</i>       | GRMZM2G121878 | Si003882m.g       | Si003882m.g | Y       | Core pathway     | 5                                 | 5                        |
| <i>NADP-ME</i>  | GRMZM2G085019 | Si000645m.g       | Si000645m.g | Y       | Core pathway     | 9                                 | 8                        |
| <i>PEPC</i>     | GRMZM2G083841 | Si005789m.g       | Si005789m.g | Y       | Core pathway     | 6                                 | 6                        |
| <i>NADP-MDH</i> | GRMZM2G129513 | Si013632m.g       | Si013632m.g | Y       | Core pathway     | 4                                 | 4                        |
| <i>AK</i>       | GRMZM2G178192 | Si014186m.g       | Si014186m.g | Y       | Core pathway     | 11                                | 17                       |
| <i>ASP-AT</i>   | GRMZM5G836910 | Si017156m.g       | Si017156m.g | Y       | Core pathway     | 4                                 | 3                        |
| <i>PPDK</i>     | GRMZM2G306345 | Si021174m.g       | Si021174m.g | Y       | Core pathway     | 2                                 | 2                        |
| <i>RBCACT</i>   | GRMZM2G162200 | Si026402m.g       | Si026402m.g | Y       | Core pathway     | 3                                 | 3                        |
| <i>PPDK-RP</i>  | GRMZM2G131286 | Si032116m.g       | Si032116m.g | Y       | Core pathway     | 1                                 | 2                        |
| <i>PCK</i>      | GRMZM2G001696 | Si034404m.g       | Si034404m.g | Y       | Core pathway     | 1                                 | 2                        |
| <i>MEP3b</i>    | GRMZM2G305851 | Si024315m.g       | Si000451m.g | N       | Transport        | 10                                | 9                        |
| <i>PPT</i>      | GRMZM2G174107 | Si013874m.g       | Si013874m.g | Y       | Transport        | 8                                 | 10                       |
| <i>MEP3a</i>    | GRMZM2G138258 | Si005376m.g       | Si024315m.g | N       | Transport        | 10                                | 9                        |
| <i>OMT1</i>     | GRMZM2G383088 | Si024403m.g       | Si024403m.g | Y       | Transport        | 4                                 | 3                        |
| <i>DIT1</i>     | GRMZM2G040933 | Si029415m.g       | Si029415m.g | Y       | Transport        | 4                                 | 3                        |
| <i>DCT2</i>     | GRMZM2G086258 | Si013503m.g       | Si035016m.g | N       | Transport        | 4                                 | 3                        |
| <i>TKL</i>      | GRMZM2G033208 | Si005927m.g       | Si005927m.g | Y       | Calvin cycle     | 5                                 | 2                        |
| <i>RPI</i>      | GRMZM5G874903 | Si038812m.g       | Si030780m.g | N       | Calvin cycle     | 4                                 | 5                        |
| <i>FBA</i>      | GRMZM2G046284 | Si010312m.g       | Si010312m.g | Y       | Calvin cycle     | 7                                 | 7                        |
| <i>PRK</i>      | GRMZM2G162529 | Si017390m.g       | Si017390m.g | Y       | Calvin cycle     | 7                                 | 10                       |
| <i>GAP-DH</i>   | GRMZM5G845611 | Si035707m.g       | Si035707m.g | Y       | Calvin cycle     | 6                                 | 8                        |
| <i>PGK</i>      | GRMZM2G083016 | Si021917m.g       | Si021917m.g | Y       | Calvin cycle     | 4                                 | 5                        |
| <i>TPI</i>      | GRMZM5G852968 | Si030636m.g       | Si030636m.g | Y       | Calvin cycle     | 3                                 | 5                        |
| <i>RPE</i>      | GRMZM2G026807 | Si036994m.g       | Si036994m.g | Y       | Calvin cycle     | 2                                 | 3                        |
| <i>FBP</i>      | GRMZM2G306732 | Si035941m.g       | Si035941m.g | Y       | Calvin cycle     | 5                                 | 5                        |
| <i>SHMT</i>     | GRMZM2G135283 | Si035240m.g       | Si035240m.g | Y       | Photorespiration | 5                                 | 7                        |
| <i>GCH</i>      | GRMZM2G399183 | Si011200m.g       | Si011200m.g | Y       | Photorespiration | 4                                 | 4                        |
| <i>GOX</i>      | GRMZM2G129246 | Si029923m.g       | Si040072m.g | N       | Photorespiration | 6                                 | 4                        |
