# Supplementary material
Source: PubMed Central journal article supplement (PMC4012605)
Supplement: supp_pp.114.238667_238667Supplementary_Table_5.pdf [file supp_pp.114.238667_238667Supplementary_Table_5.pdf]

**Supplementary Table V.** Differentially expressed *Setaria viridis* genes that are homologous to genes that are induced by expression of *GLK1* or *GLK2* in *Arabidopsis thaliana* (Waters et al., 2009). Library normalised read counts, fold enrichment in each cell type, and Benjamini-Hochberg procedure adjusted p-values are shown.

| Gene           | ID          | Cell type | M         | BS        | Fold change $\frac{BS}{M}$ | Log <sub>2</sub> Fold change $\frac{BS}{M}$ | P Adjusted |
|----------------|-------------|-----------|-----------|-----------|----------------------------|---------------------------------------------|------------|
| <i>LHCB1.5</i> | Si030845m.g | M         | 329754.59 | 214256.15 | 0.65                       | -0.62                                       | 8.59E-03   |
| <i>LHCB3</i>   | Si030808m.g | M         | 69664.66  | 19689.81  | 0.28                       | -1.82                                       | 1.67E-08   |
| <i>LHCB4.1</i> | Si030702m.g | M         | 158921.39 | 59306.42  | 0.37                       | -1.42                                       | 1.86E-10   |
| <i>LHCB5</i>   | Si026725m.g | M         | 170643.29 | 82151.23  | 0.48                       | -1.05                                       | 2.94E-06   |
| <i>LHCB6</i>   | Si010905m.g | M         | 62537.49  | 30560.26  | 0.49                       | -1.03                                       | 4.53E-05   |
| <i>PsbO</i>    | Si002174m.g | M         | 205984.25 | 113623.24 | 0.55                       | -0.86                                       | 1.51E-04   |
| <i>PsbP</i>    | Si007114m.g | M         | 135618.28 | 51708.91  | 0.38                       | -1.39                                       | 4.06E-10   |
| <i>PsbQ-1</i>  | Si031101m.g | M         | 73530.28  | 30563.35  | 0.42                       | -1.27                                       | 1.34E-07   |
| <i>PsbR</i>    | Si014601m.g | M         | 188920.46 | 57988.65  | 0.31                       | -1.70                                       | 2.93E-14   |
| <i>PsbW</i>    | Si003335m.g | M         | 52710.16  | 36366.80  | 0.69                       | -0.54                                       | 2.32E-02   |
| <i>PsbX</i>    | Si031565m.g | M         | 50384.36  | 15294.66  | 0.30                       | -1.72                                       | 1.32E-14   |
| <i>LHCA1</i>   | Si006996m.g | BS        | 135715.62 | 224475.38 | 1.65                       | 0.73                                        | 4.15E-03   |
| <i>LHCA2</i>   | Si030861m.g | BS        | 123485.25 | 191924.38 | 1.55                       | 0.64                                        | 6.92E-02   |
| <i>LHCA2.1</i> | Si030730m.g | BS        | 2927.20   | 13013.07  | 4.45                       | 2.15                                        | 1.32E-11   |
| <i>LHCA3</i>   | Si007049m.g | BS        | 130094.59 | 179673.04 | 1.38                       | 0.47                                        | 9.85E-02   |
| <i>LHCA4</i>   | Si014351m.g | BS        | 115742.58 | 232766.89 | 2.01                       | 1.01                                        | 3.12E-05   |
| <i>PsaD</i>    | Si037566m.g | BS        | 102649.53 | 163186.65 | 1.59                       | 0.67                                        | 1.00E-02   |
| <i>PsaF</i>    | Si037323m.g | BS        | 112081.39 | 161774.63 | 1.44                       | 0.53                                        | 4.69E-02   |
| <i>PsaG</i>    | Si031456m.g | BS        | 50176.04  | 88714.89  | 1.77                       | 0.82                                        | 2.36E-02   |
| <i>PsaK</i>    | Si031478m.g | BS        | 58531.95  | 91696.60  | 1.57                       | 0.65                                        | 1.29E-02   |
| <i>PsaL</i>    | Si023254m.g | BS        | 132010.63 | 203674.75 | 1.54                       | 0.63                                        | 1.74E-02   |
