# Supplementary material
Source: PubMed Central journal article supplement (PMC4012605)
Supplement: supp_pp.114.238667_238667Supplementary_Table_6.pdf [file supp_pp.114.238667_238667Supplementary_Table_6.pdf]

**Supplementary Table VI.** Transcriptional regulators and RNA-binding proteins implicated in chloroplast function in mesophyll (M) and bundle sheath (BS) cells of *S. viridis* and maize. Syntenic relationships are derived from Schnable et al. (2012).

| Gene          | <i>Setaria</i> ID | Maize ID      | Syntenic | Genes per family - <i>Setaria</i> | Genes per family - maize |
|---------------|-------------------|---------------|----------|-----------------------------------|--------------------------|
| Unnamed       | Si026826m.g       | GRMZM2G177895 | No       | 2                                 | 1                        |
|               | Si011021m.g       |               | Yes      | 2                                 | 1                        |
| <i>IDD5</i>   | Si016736m.g       | GRMZM2G129261 | No       | 25                                | 37                       |
|               | Si009633m.g       |               | Yes      | 25                                | 37                       |
| <i>IDD5</i>   | Si029540m.g       | GRMZM2G042666 | Yes      | 25                                | 37                       |
| <i>IDD5</i>   | Si013546m.g       | GRMZM2G179677 | Yes      | 25                                | 37                       |
| <i>GLK1</i>   | Si006400m.g       | GRMZM2G026833 | No       | 19                                | 29                       |
| <i>PTAC12</i> | Si000722m.g       | GRMZM5G897926 | Yes      | 2                                 | 1                        |
| <i>SIG2</i>   | Si026193m.g       | GRMZM2G143392 | Yes      | 6                                 | 9                        |
| Unnamed       | Si034188m.g       | GRMZM2G089696 | Yes      | 2                                 | 1                        |
| <i>TCP4</i>   | Si004293m.g       | GRMZM2G148022 | Yes      | 10                                | 17                       |
| Unnamed       | Si002496m.g       | GRMZM2G166946 | Yes      | 10                                | 17                       |
| <i>GLK2</i>   | Si001336m.g       | GRMZM2G087804 | Yes      | 19                                | 29                       |
| <i>MFP1</i>   | Si000389m.g       | GRMZM2G142413 | Yes      | 2                                 | 1                        |
| Unnamed       | Si010801m.g       | GRMZM2G090271 | Yes      | 12                                | 11                       |
| <i>ORRM1</i>  | Si017445m.g       | GRMZM5G899787 | Yes      | 14                                | 18                       |
| Unnamed       | Si036195m.g       | GRMZM2G016084 | Yes      | 2                                 | 1                        |
| <i>CRB</i>    | Si022373m.g       | GRMZM2G165655 | No       | 2                                 | 2                        |
