# Supplementary material
Source: PubMed Central journal article supplement (PMC4012605)
Supplement: supp_pp.114.238667_238667Supplementary_Table_7.pdf [file supp_pp.114.238667_238667Supplementary_Table_7.pdf]

**Supplementary Table VII.** Transcripts encoding chloroplast regulators are preferentially abundant in either mesophyll or bundle sheath cells of *Sorghum bicolor*. qPCR data represent mean  $\Delta\Delta C_t$  values for three biological replicates and the standard deviation is shown. Syntenic relationships are derived from Schnable et al. (2012).

|                            | Sorghum ID  | Syntenic       |       | Cell preference        |         | M              | BS            | Fold change $\frac{BS}{M}$ |
|----------------------------|-------------|----------------|-------|------------------------|---------|----------------|---------------|----------------------------|
|                            |             | <i>Setaria</i> | Maize | <i>Setaria</i> & maize | Sorghum |                |               |                            |
| Transcriptional regulators |             |                |       |                        |         |                |               |                            |
| Unnamed                    | Sb08g001890 | Yes            | Yes   | M                      | M       | 29.9004±7.3010 | 6.4865±1.3048 | 0.2169                     |
| <i>IDD5</i>                | Sb02g032400 | Yes            | Yes   | M                      | M       | 0.0188±0.0049  | 0.0012±0.0003 | 0.0659                     |
| <i>IDD5</i>                | Sb07g024550 | Yes            | Yes   | M                      | M       | 0.0423±0.0100  | 0.0023±0.0003 | 0.0533                     |
| <i>PTAC12</i>              | Sb03g035780 | Yes            | Yes   | M                      | BS      | 0.0193±0.0081  | 0.0236±0.0151 | 1.2219                     |
| Unnamed                    | Sb01g007490 | Yes            | Yes   | M                      | M       | 0.2794±0.0912  | 0.2217±0.1284 | 0.7937                     |
| <i>TCP4</i>                | Sb03g034918 | Yes            | Yes   | BS                     | BS      | 0.0186±0.0060  | 0.0541±0.0140 | 2.9092                     |
| Unnamed                    | Sb03g035350 | Yes            | Yes   | BS                     | BS      | 0.0308±0.0086  | 0.0503±0.0054 | 1.6309                     |
| <i>GLK2</i>                | Sb03g000400 | Yes            | Yes   | BS                     | BS      | 0.0123±0.0037  | 0.0533±0.0283 | 4.3265                     |
| RNA binding proteins       |             |                |       |                        |         |                |               |                            |
| Unnamed                    | Sb06g026990 | Yes            | Yes   | M                      | M       | 3.1165±0.7646  | 0.5160±0.1824 | 0.1656                     |
| <i>ORMM1</i>               | Sb04g028980 | Yes            | Yes   | M                      | M       | 0.0313±0.0208  | 0.0229±0.0131 | 0.7312                     |
| Unnamed                    | Sb01g001480 | Yes            | Yes   | M                      | BS      | 0.2372±0.0652  | 0.5037±0.2693 | 2.1234                     |
